# Supplementary material
Source: publisher site journal article supplement (https://www.dovepress.com/article/345059)
Supplement: Supplementary file 1 [file get_supplementary_file.php]

**Supplementary material**

**Development and validation of a prediction model for 5-year risk of kidney dysfunction in patients with hypertension and glucose metabolism disorder**

**All author’s names:** Mengyue Lin1,2, Mulalibieke Heizhati1, Lin Gan1, 2, Ling Yao1, Wenbo Yang1, Mei Li1, Jing Hong1, Zihao Wu1, Hui wang1,2, Nanfang Li1

**Authors’ affiliation:**

1 Hypertension Center of People’s Hospital of Xinjiang Uygur Autonomous Region; Xinjiang Hypertension Institute; National Health Committee Key Laboratory of Hypertension Clinical Research; Key Laboratory of Xinjiang Uygur Autonomous Region "Hypertension Research Laboratory”; Xinjiang Clinical Medical Research Center for Hypertension (Cardio-Cerebrovascular) Diseases.

2 Xinjiang Medical University, Urumqi, Xinjiang, China.

**Correspondence:** Nanfang Li; E-mail: [lnanfang2016@sina.com](mailto:lnanfang2016@sina.com)

**
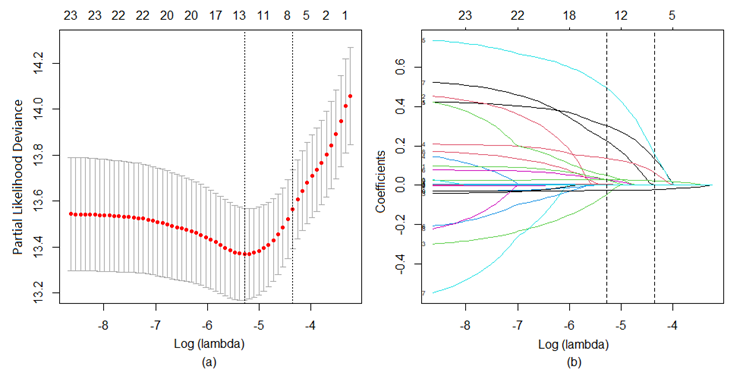
**

**Figure S1** Feature selection using LASSO regression model. (a) Ten-fold cross-validation via minimum criteria was applied for optimal parameter (lambda) selection through LASSO model. Partial likelihood deviance (binomial deviance) curve was schemed versus log (lambda). Dotted vertical lines were drawn at the optimal values by using the minimum criteria and 1 SE of the minimum criteria. (b) LASSO coefficient profiles of the selected features. A coefficient profile plot was produced against the log (lambda) sequence. Vertical line was generated at the value selected by ten-fold cross-validation.
